# Supplementary material for: Toxic Shock Syndrome after Surgery: Case Presentation and Systematic Review of the Literature
Source: PubMed Central journal article supplement — Plast Reconstr Surg Glob Open. 2020 May 29;8(5):e2499. doi: 10.1097/GOX.0000000000002499 (PMC7572075; doi:10.1097/gox.0000000000002499), 2020-05-29
Supplement: gox-8-e2499-s001.pdf [file gox-8-e2499-s001.pdf]

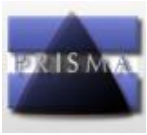

## PRISMA 2009 Flow Diagram

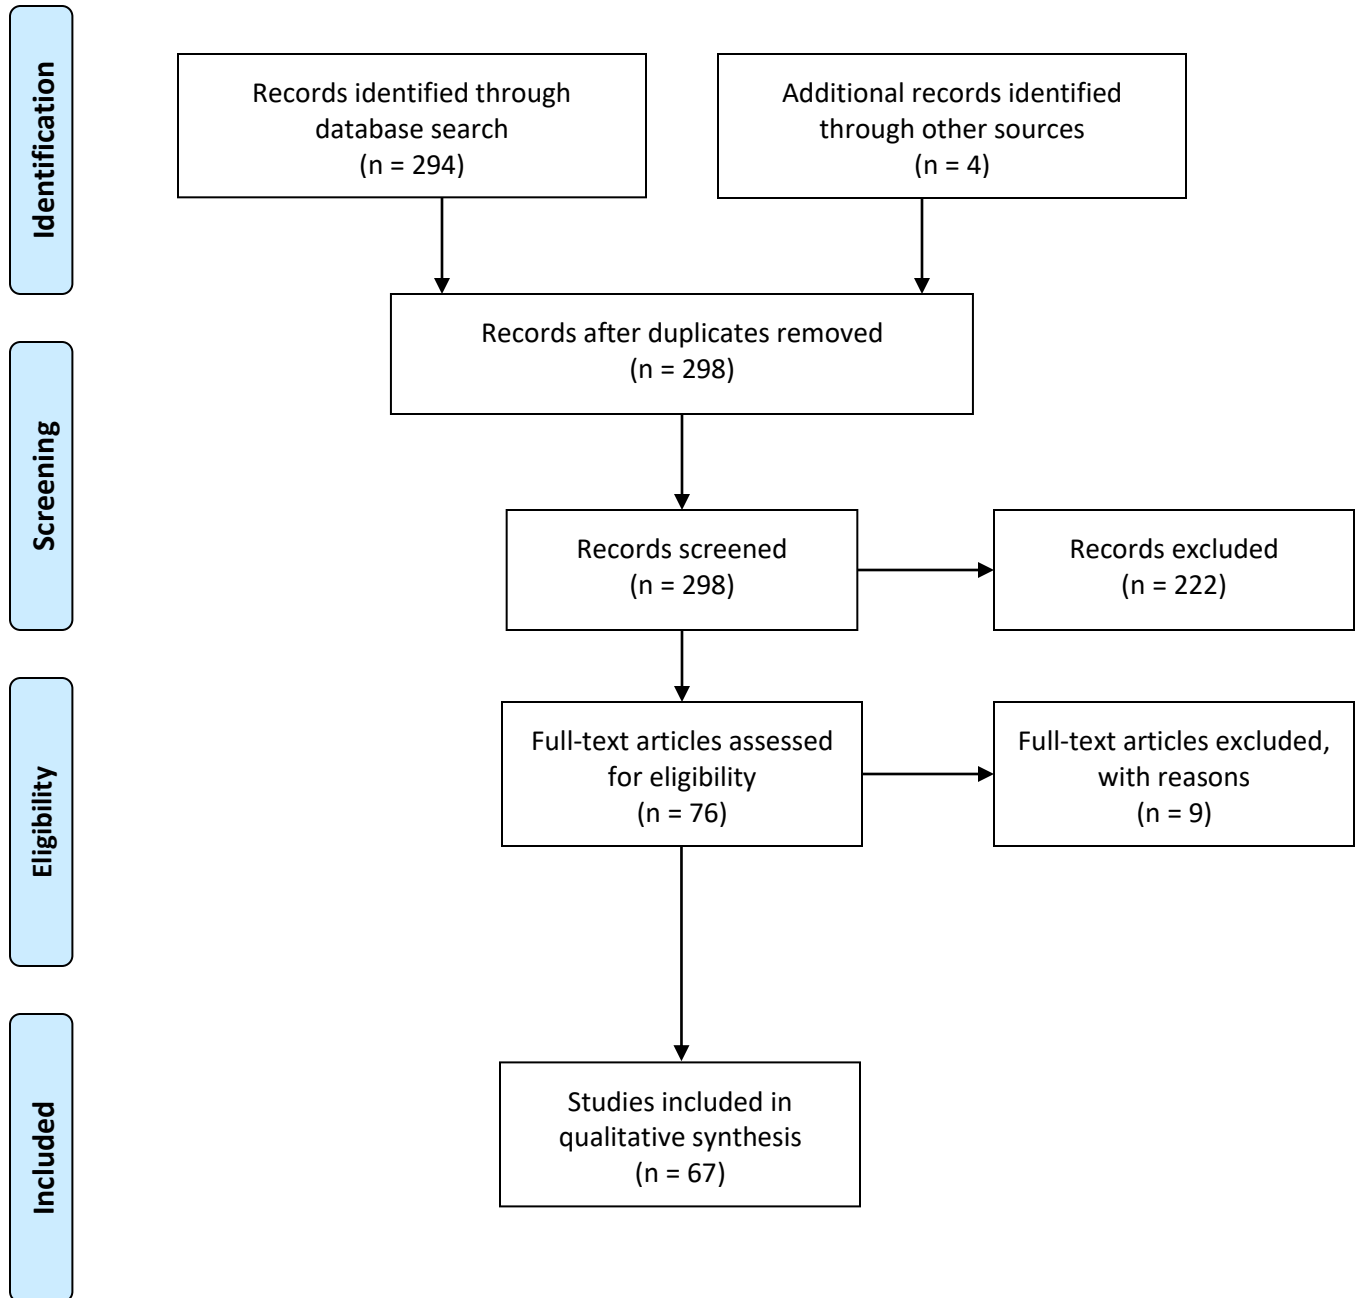

From: Moher D, Liberati A, Tetzlaff J, Altman DG, The PRISMA Group (2009). Preferred Reporting Items for Systematic Reviews and Meta-Analyses: The PRISMA Statement. PLoS Med 6(7): e1000097. doi:10.1371/journal.pmed1000097

For more information, visit [www.prisma-statement.org](http://www.prisma-statement.org).
